# Supplementary material
Source: HighWire-hosted journal article supplement (https://bmjopen.bmj.com/content/9/7/e028748)
Supplement: inline-supplementary-material-1 [file inline-supplementary-material-1.pdf]

## Appendix 1: Search terms

Ovid (1946 onwards)

Medline

Exp emergency service, hospital/ or exp emergency medical services/ or  
emergency care provider or exp emergency medicine/ or exp emergency  
nursing/ or exp emergency nurse

AND

Exp emigrants and immigrants/ or exp transients and migrants/ or exp  
refugees/ or exp undocumented immigrants/ or asylum seeker/ or displaced  
person

436 results

Embase

Exp emergency care/ or emergency health service/ or emergency medicine/ or  
emergency physician/ or emergency nursing

Exp migrant/ or undocumented/ or immigrant/ or refugee/ or asylum seeker

445 results

Psyh Info

Exp emergency services/ or health personnel/ or (accident and emergency)

Exp immigrants/ or refugees/ or at risk populations/or asylum seeking

1431

Exp qualitative research/ or surveys/ or telephone surveys/ or mail surveys/ or  
questionnaires/ or health personnel attitudes/ or social perception

Surveys and questionnaires were included in case of using this terminology for  
qualitative work.

129 results

Other databases

CiNahl (1981 onwards)

Exp emergency doctor/ or emergency nurse/ or health care provider/ or  
emergency department/ or accident and emergency/ or emergency service

Exp migrant/or immigrant/ or asylum seeker/ or UM/ or irregular migrant/ or  
refugee/ or displaced person

0 results

Web of science

'emergency care and migrant'

145 results (6 relevant)

PubMed

The Medical Subject Heading (MeSH) search tool was used

'migrant' AND 'emergency care'

225 results

Trip database

199 articles (8 relevant)

Google scholar

"emergency care" AND "migrant" AND "qualitative"

2280 results – first 250 searched and then the results became irrelevant
